# Supplementary material for: The oldest fossil bird-like footprints from the upper Triassic of southern Africa
Source: PLoS One. 2023 Nov 29;18(11):e0293021. doi: 10.1371/journal.pone.0293021 (PMC10686444; doi:10.1371/journal.pone.0293021)
Supplement: S3 Table — Blank fields indicate that the specific parameter, defined in Fig 1, could not be measured due to unclear track or trackway morphology. For cast material and published illustration trackways, see S1 Fig; for location map, see Fig 2. (XLSX) [file pone.0293021.s005.xlsx]

## Sheet: Sheet1
	Track #	Morphotype	Track rotation	Stride length:average track length	Pace angulation (°)
	35	I
	33		-6	track 34 to 35: 6	track 34 to 35: 151
	34		4
	64	I	9.5
	65		14	track 64 to 66: 7	track 64 to 66: 168
	66
	67	I	10.6
	68		28.9	track 67 to 69: 7	track 67 to 69: 180
	69		10.3
	70	I	2.8
	71		8
	72	I
	73			track 72 to 74: 7.5	track 72 to 74: 173
	74
	73	I
	76		18	track 75 to 77: 9	track 75 to 77: 172
	77		15.5	track 76 to 78: 9	track 76 to 78: 175
	78		18
	79	II
	80		6.5	track 79 to 81: 10.5	track 79 to 81: 166
	81		17
	82	II	10
	83		20	track 82 to 84: 7.5	track 82 to 84: 154
	84		-15.6	track 83 to 85: 7.5	track 83 to 85: 157
	85
86	55	II	21
87	56		-13.7	track 86 to 88: 9	track 86 to 88: 154
88	57		16.8	track 87 to 89: 9	track 86 to 88: 160
89	58		-14
